# Supplementary material
Source: Springer Nature journal article supplement (https://www.springermedizin.de/resource/supplementary/13014_2011_607_MOESM3_ESM.pdf/9634140)
Supplement: MOESM3 [file 9634140]

**Table 1**

SNP characteristics and population

| Gene         | rs no.    | SNP <sup>a</sup> | Codon/position | Change in amino acid | Function of gene product | Primers                         |                                | Relative excess heterozygosity (95% confidence interval) | p-value HWE <sup>b</sup> |
|--------------|-----------|------------------|----------------|----------------------|--------------------------|---------------------------------|--------------------------------|----------------------------------------------------------|--------------------------|
| <i>ATM</i>   | rs1801516 | G/A              | 1853           | Asp>Asn              | DNA repair               | ---                             | ---                            | 0.802 (0.350 – 1.861)                                    | 0.842                    |
| <i>GSTP1</i> | rs1695    | A/G              | 105            | Val>Isoleu           | ROS pathway              | 5'-ACCCCAGGGC<br>TCTATGGGAA-3'  | 5'-TGAGGGCACA<br>AGAAGCCCCT-3' | 1.104 (0.670 – 1.815)                                    | 0.924                    |
| <i>SOD2</i>  | rs4880    | C/T              | 16             | Ala>Val              | ROS pathway              | ---                             | ---                            | 1.798 (1.130 – 2.849)                                    | 0.037                    |
| <i>TGFB1</i> | rs1800469 | C/T              | pos.509        | –                    | Pro-fibrotic cytokine    | 5'-CAGACTTCTA<br>GAGACTGTCAG-3' | 5'-GTCACCAGAG<br>AAAGAGGAC-3'  | 0.993 (0.640 – 1.549)                                    | 0.987                    |
| <i>XPD</i>   | rs13181   | A/C              | 751            | Lys>Gln              | DNA repair               | ---                             | ---                            | 1.030 (0.640 – 1.656)                                    | 0.987                    |
| <i>XRCC1</i> | rs25487   | G/A              | 399            | Arg>Gln              | DNA repair               | 5'-TTGTGCTTTC<br>TCTGTGTCCA-3'  | 5'-TCCTCCAGCC<br>TTTCTGATA-3'  | 0.735 (0.460 – 1.164)                                    | 0.424                    |

<sup>a</sup> major allele / minor allele<sup>b</sup> p-value of the exact Hardy-Weinberg equilibrium lack of fit test.
